# Supplementary material for: Disease modeling of a mutation in α‐actinin 2 guides clinical therapy in hypertrophic cardiomyopathy
Source: PubMed Central journal article supplement (PMC6895603; doi:10.15252/emmm.201911115), 2019-11-03
Supplement: EMMM-11-e11115-s006.pdf [file EMMM-11-e11115-s006.pdf]

a

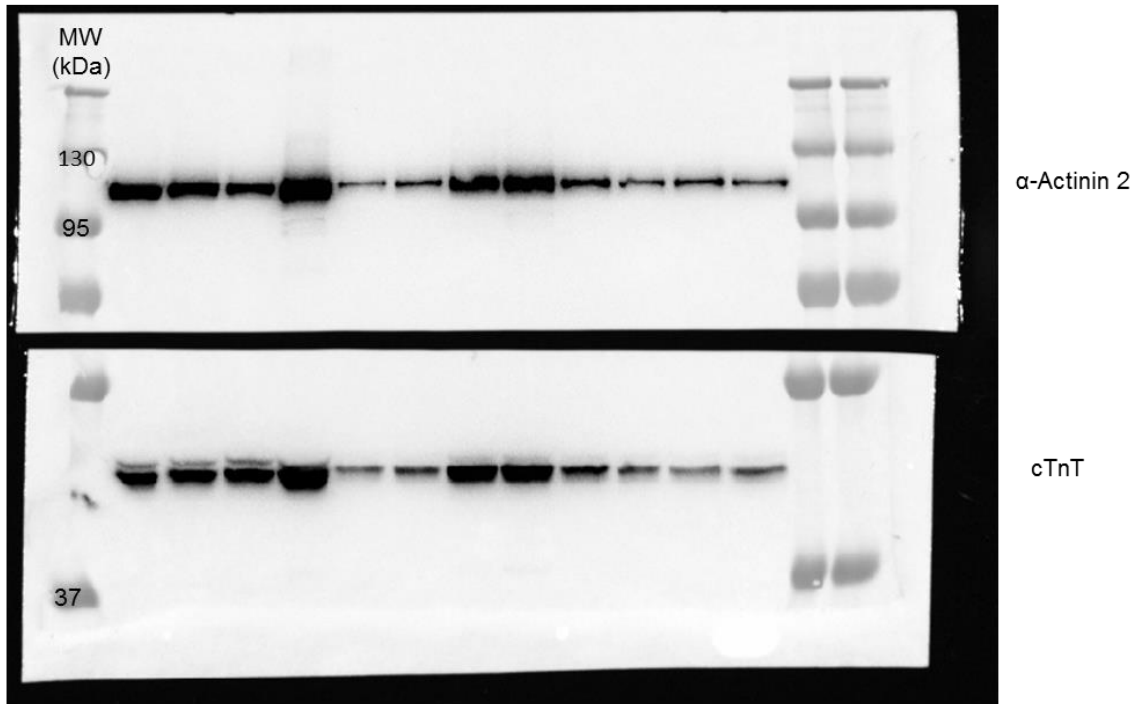

b

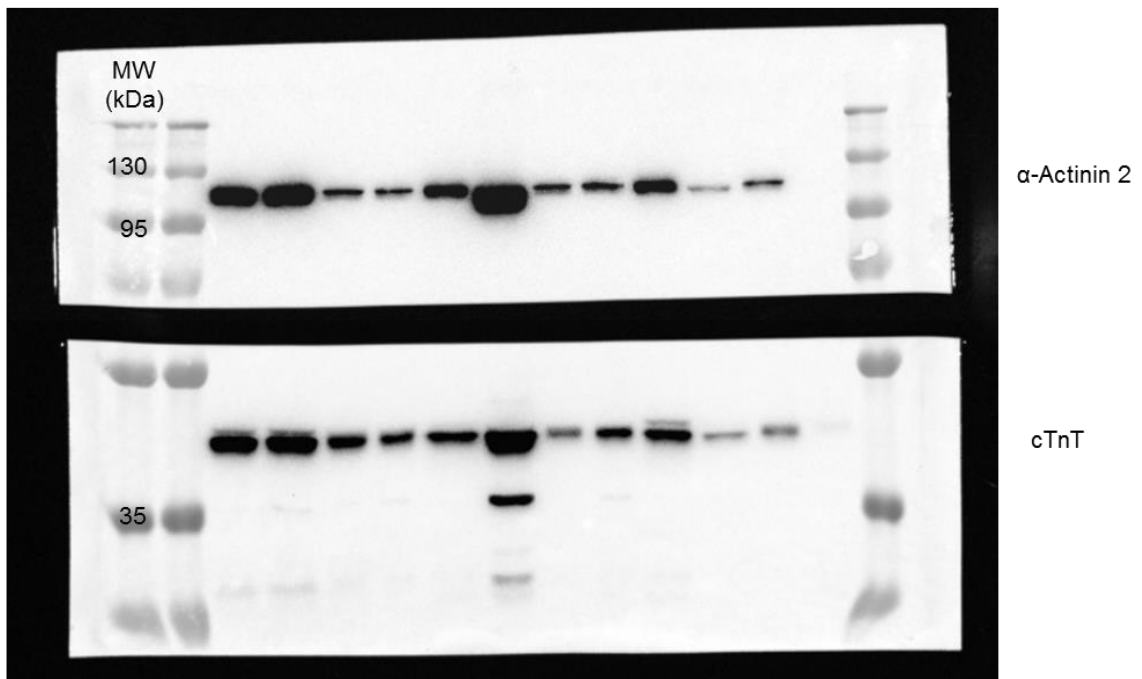

**Source data to Figure 1:** (a) Full western blot to the corresponding Figure 1C. (b) Full western blot to the corresponding Figure 1D.
